# Supplementary material for: Fast synthesis of ultra-thin ZnSnO3 nanorods with high ethanol sensing properties
Source: Royal Society of Chemistry journal article supplement (doi:10.1039/c0cc02222e), 2010-01-01

## Supporting Information Available

### Fast Synthesis of Ultra-thin ZnSnO<sub>3</sub> Nanorods with High Ethanol Sensing Properties

Hai Men,<sup>†</sup> Peng Gao,<sup>†,\*</sup> Baibin Zhou,<sup>§</sup> Yujin Chen,<sup>‡,\*</sup> Chunling Zhu,<sup>†</sup> Gang Xiao,<sup>‡</sup>  
Longqiang Wang<sup>†</sup> and Milin Zhang<sup>†</sup>

<sup>†</sup> College of Material Science and Chemical Engineering, Harbin Engineering University,  
Harbin, 150001, China

<sup>‡</sup> College of Science, Harbin Engineering University, Harbin, 150001, China

<sup>§</sup> School of Chemical Engineering, Harbin Institute of Technology, Harbin, Heilongjiang,  
150001, P. R. China

RECEIVED DATE (automatically inserted by publisher); E-mail: gaopeng@hrbeu.edu.cn, chenyuji@hrbeu.edu.cn

**Figure S1.** TEM and SEM images of the products synthesized with different addition of ZnO nanorods in mixed solvent (a) 0.04 g ZnO nanorods, (b) 0.02g ZnO nanorods and (c) without ZnO nanorods, the scale bar in the inset is 3 nm.

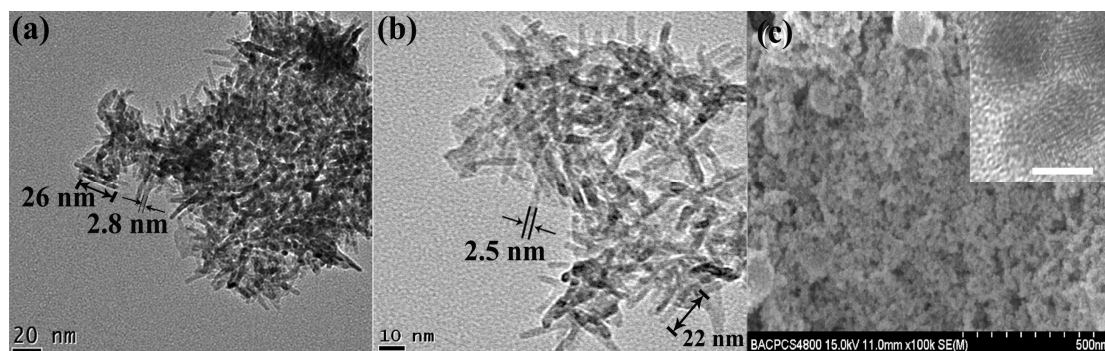

**Figure S2.** (a) and (b) XRD pattern and HRTEM images of the products reacted for 0.5 hour, which proved the existence of  $\text{ZnSnO}_3$  and  $\text{ZnO}$ .

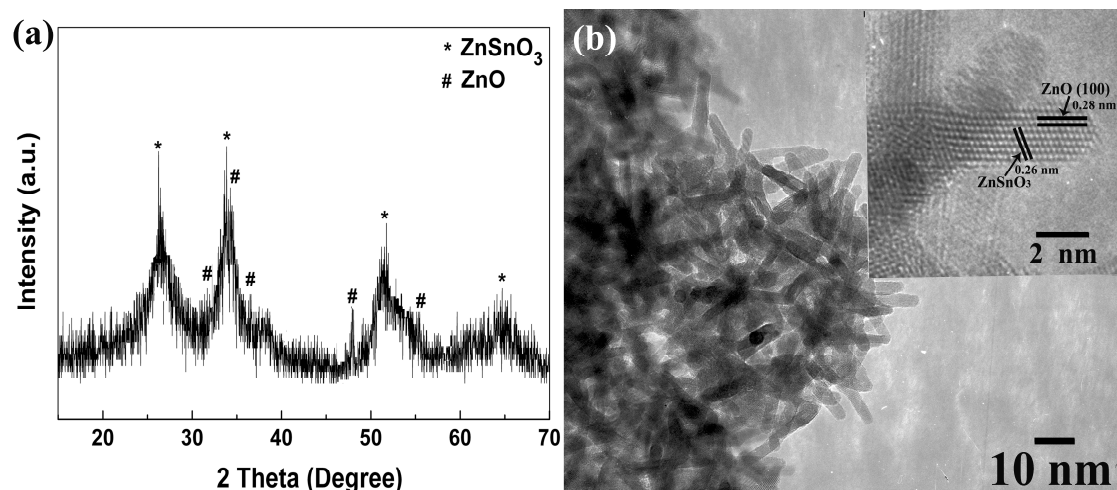

**Figure S3.** EDS spectra of the deposits and the solution in the autoclave after the hydrothermal reaction. (a) the deposits; (b) the solution.

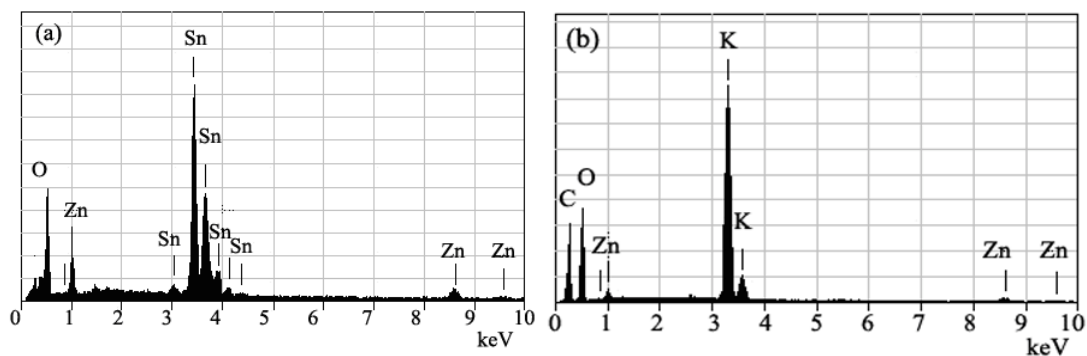

Supplement: c0cc02222e.pdf [file c0cc02222e.pdf]
